# Supplementary material for: Structural characterization of two γδ TCR/CD3 complexes
Source: PubMed Central journal article supplement — Nat Commun. 2025 Jan 2;16:318. doi: 10.1038/s41467-024-55467-5 (PMC11697310; doi:10.1038/s41467-024-55467-5), 2025-01-02
Supplement: 41467_2024_55467_MOESM1_ESM.pdf [file 41467_2024_55467_MOESM1_ESM.pdf]

a

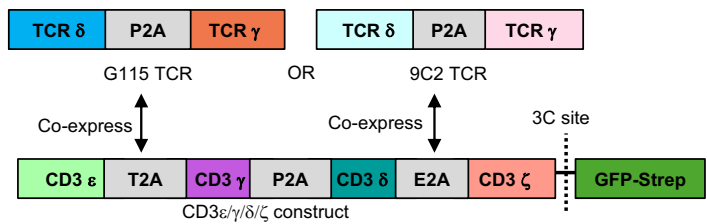

b

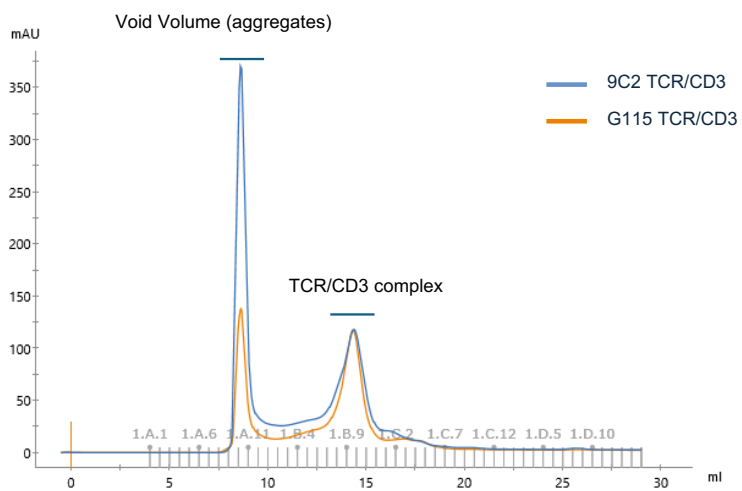

**Supplementary Figure 1. Purification of two clonotypic  $\gamma\delta$  TCR/CD3 complexes.**

- a) Schematic representation of constructs used to express the  $\gamma\delta$  TCR/CD3 complexes.
- b) Size exclusion chromatography profile using Superose 6 Increase 10/300 GL column of detergent-solubilized  $\gamma\delta$  TCR/CD3 complexes following GFP-strep tag cleavage.

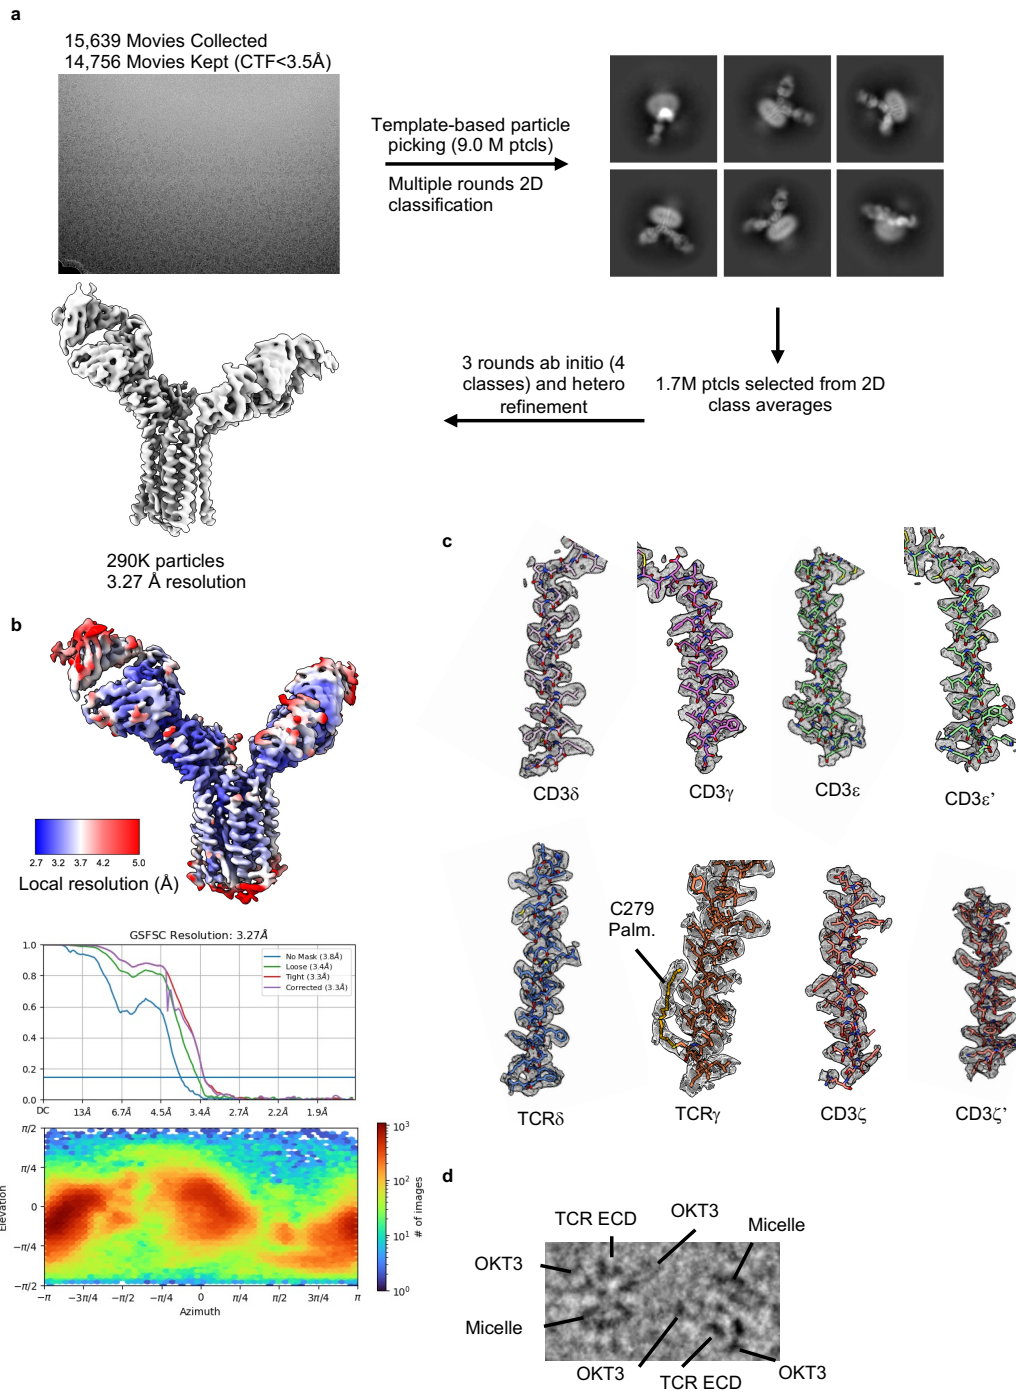

**Supplementary Figure 2. CryoEM structure of OKT3 Fab-bound G115 TCR/CD3.**

**a)** Data processing pipeline. Only representative 2D class averages are shown. **b)** CryoEM map filtered and colored according to local resolution, gold standard FSC curve, and particle orientation distribution as produced by CryoSPARC. **c)** Density fit of indicated TCR/CD3 chain TM domains into cryoEM densities. The cryoEM density protruding out of TCR $\gamma$  C279 resembles a palmitoylated cysteine. This is shown for illustration but is not included in the deposited model. **d)** Two individual particles displaying the ECDs of the  $\gamma\delta$  TCR chains.

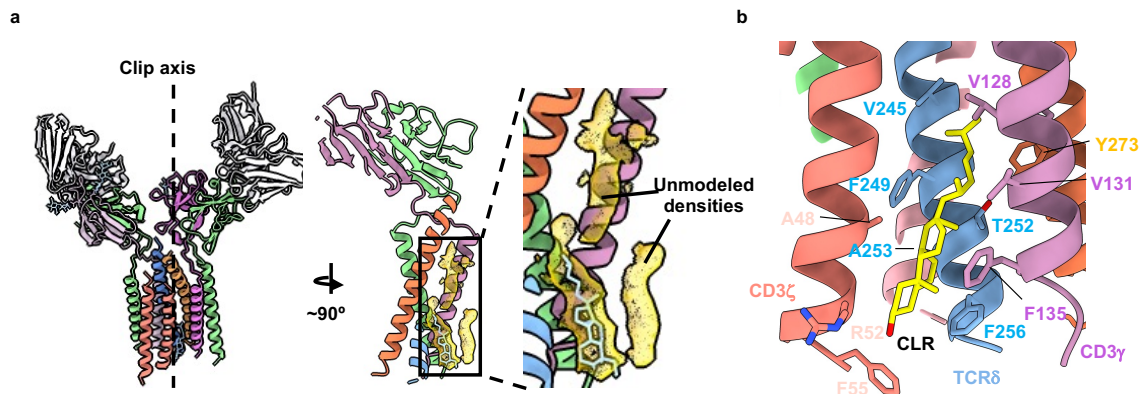

**Supplementary Figure 3. Sterol-shaped densities in  $\gamma\delta$ TCR TM domain.**

**a)** Analysis of sterol like densities in the TM region of the TCR. Boxed region in the middle is enlarged in the right panel. **b)** van der Waals interactions between a putative cholesterol (CLR) and residues in the TCR/CD3 chains.

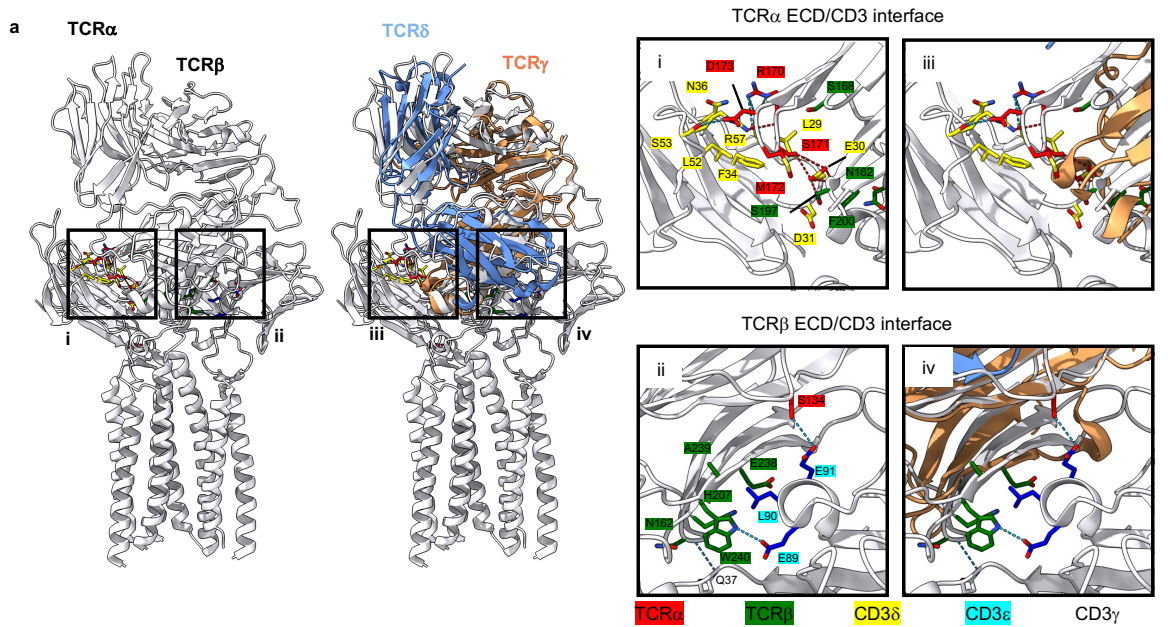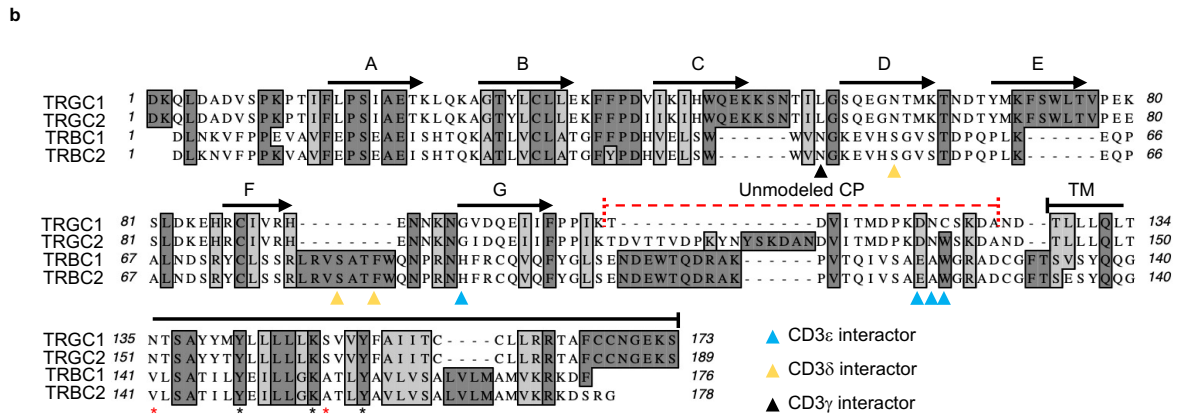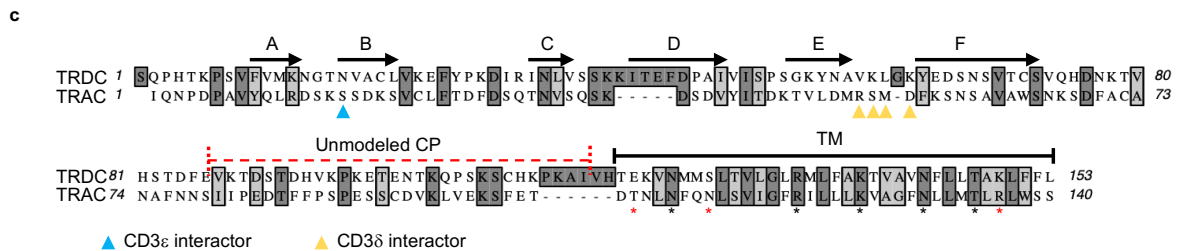

**Supplementary Figure 4.  $\alpha\beta$  TCR ECD/CD3 ECD interface residues are not conserved in  $\gamma\delta$  TCR**

**a)** Left, structure of  $\alpha\beta$  TCR/CD3 complex (PDB:8ES7) with interface residues between TCR ECDs and CD3 ECDs shown as sticks. Right, superposition of G115  $\gamma\delta$  TCR ECD (TCR $\gamma$ , orange; TCR $\delta$ , blue) onto the  $\alpha\beta$  TCR/CD3 structure. Interface residues that mediate TCR chain-CD3 chain interactions are colored as follows: Red, TCR $\alpha$ ; Green, TCR $\beta$ ; Yellow, CD3 $\delta$ ; Blue, CD3 $\epsilon$ ; Ghost White, CD3 $\gamma$ . Boxed regions on the left are enlarged on the right as indicated. **b)** Multisequence alignment of TRGC1/2 and TRBC1/2 protein sequences. **c)** Multisequence alignment of TRDC and TRAC protein sequences. Red dashed lines represent the flexible portions of the connecting peptides that are not resolved in our ECD or TM domain-containing structures. Asterisks are used to label  $\gamma\delta$ TCR residues involved in apparent hydrogen bonds with CD3. Black asterisks represent residues that are conserved between  $\alpha\beta$  and  $\gamma\delta$  TCR chains. Red asterisks represent residues that are specific to  $\gamma\delta$  TCR/CD3 complexes. Arrowheads represent residues involved in TCR-CD3 contacts, colored based on which CD3 chain they interact with, as shown in A. Note: sequences in **a)** are numbered as they appear in PDB 8ES7 while sequences in **b)** and **c)** are numbered as they appear in Uniprot, using the following accession codes: TRGC1: P0CF51; TRGC2: P03986; TRBC1: P01850; TRBC2: A0A5B9; TRDC: B7Z8K6; TRAC: P01848.



**a** 8,599 Movies Collected  
8,521 Movies Kept (CTF < 3.5 Å)

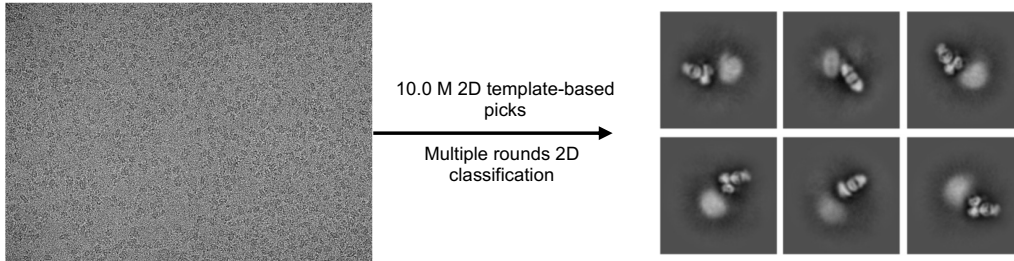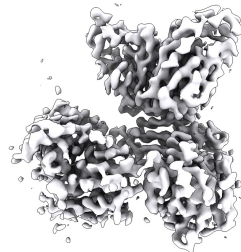

G115 ECD + Fab1 complex  
156K particles  
3.21 Å resolution

Ab initio (2 classes)  
Local refinement  
Applying mask  
around  $\gamma\delta 2$  ECD  
and Fab V domain

~250K ptcls from 2D  
class averages

**b**

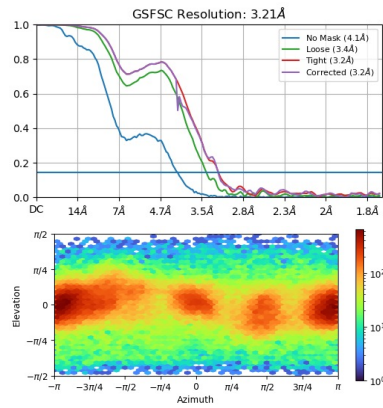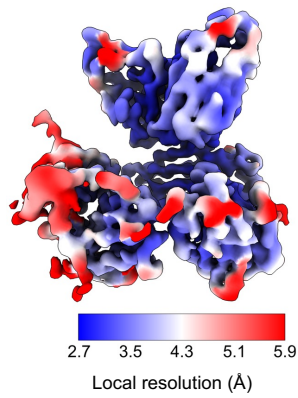

**c**

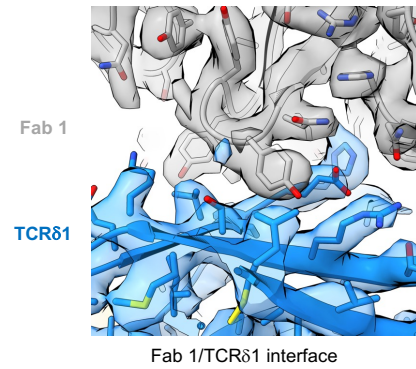

**Supplementary Figure 5. CryoEM structure of Fab 1-bound G115 TCR ECD.**

**a)** Data processing pipeline. Only representative 2D class averages are shown. **b)** CryoEM map filtered and colored according to local resolution, gold standard FSC curve, and particle orientation distribution as produced by CryoSPARC. **c)** Expanded view showing fit of model to density at the Fab 1-V $\delta$ 2 interface.

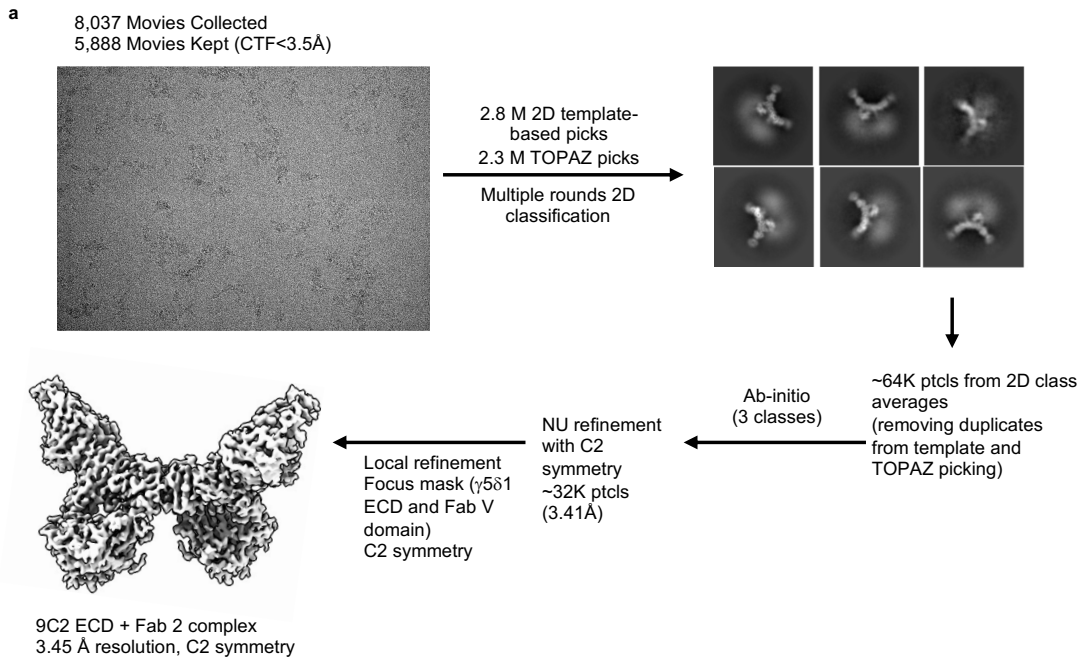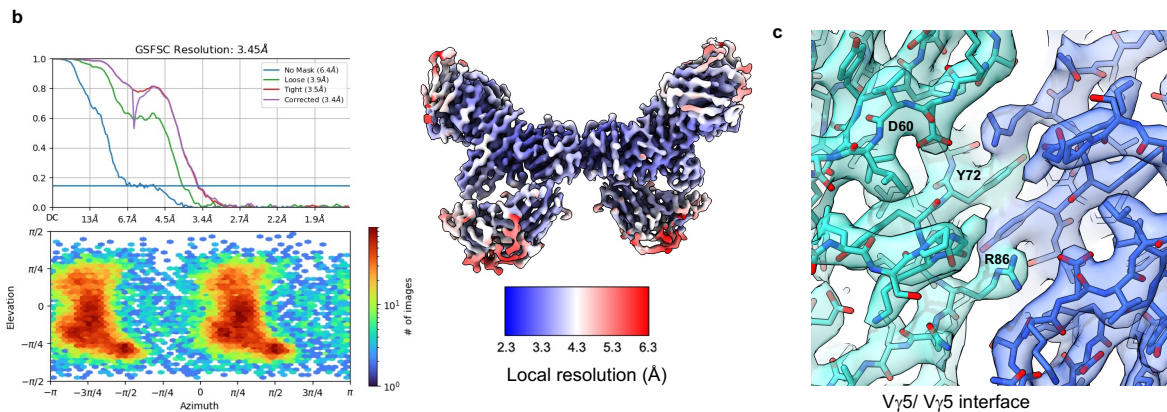

**Supplementary Figure 6. CryoEM structure of Fab 2-bound 9C2 TCR ECD.**

**a)** Data processing pipeline. Only representative 2D class averages are shown. **b)** CryoEM map filtered and colored according to local resolution, gold standard FSC curve, and particle orientation distribution as produced by CryoSPARC. **c)** Expanded view showing fit of model to density at the  $V\gamma 5/V\gamma 5$  interface.

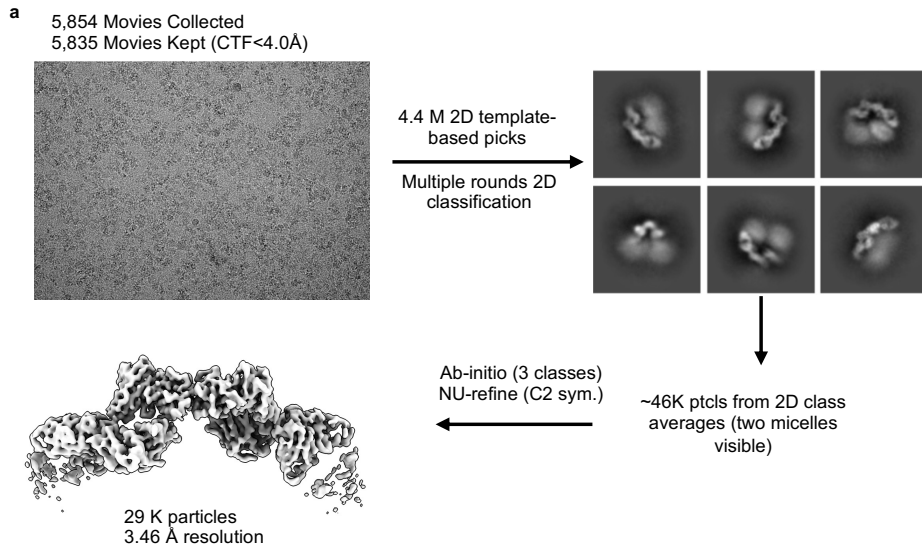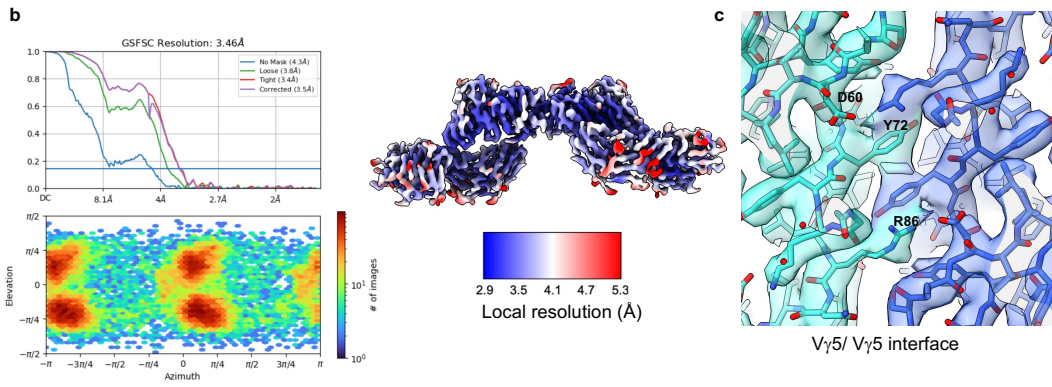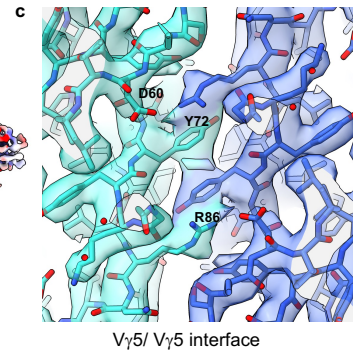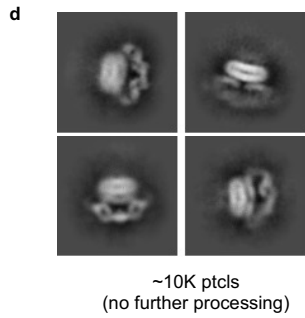

**Supplementary Figure 7. CryoEM structure of Fab 3-bound 9C2 TCR ECD.**

**a)** Data processing pipeline. Only representative 2D class averages are shown. **b)** CryoEM map filtered and colored according to local resolution, gold standard FSC curve, and particle orientation distribution as produced by CryoSPARC. **c)** Expanded view showing fit of model to density at the  $V\gamma 5/V\gamma 5$  interface. **d)** 2D class averages of a minor subset of particles showing dimeric 9C2 TCR ECDs contained within one micellar density. 3D reconstruction was not successful for these particles.

a

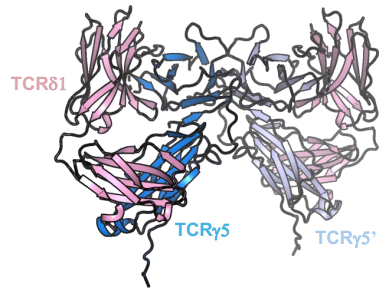

9C2 TCR ECD  
x-ray, PDB ID: 4LFH

b

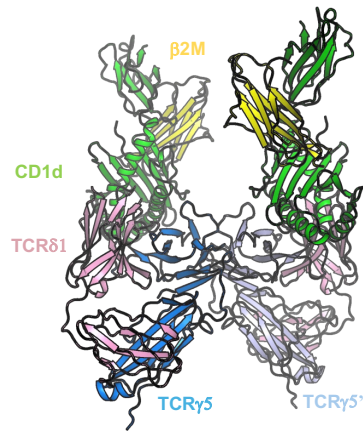

9C2 TCR ECD/CD1d complex  
x-ray, PDB ID: 4LFU

c

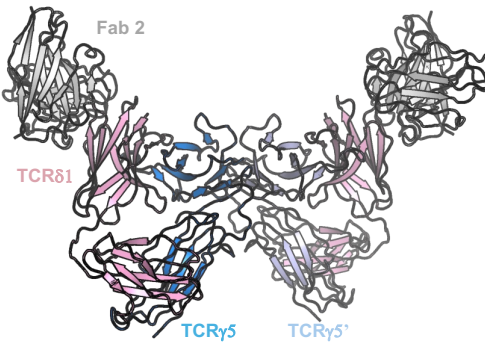

9C2 TCR + Fab 2 complex  
cryoEM, this study

d

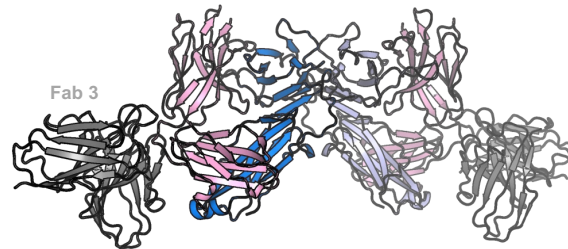

9C2 TCR + Fab 3 complex  
cryoEM, this study

e

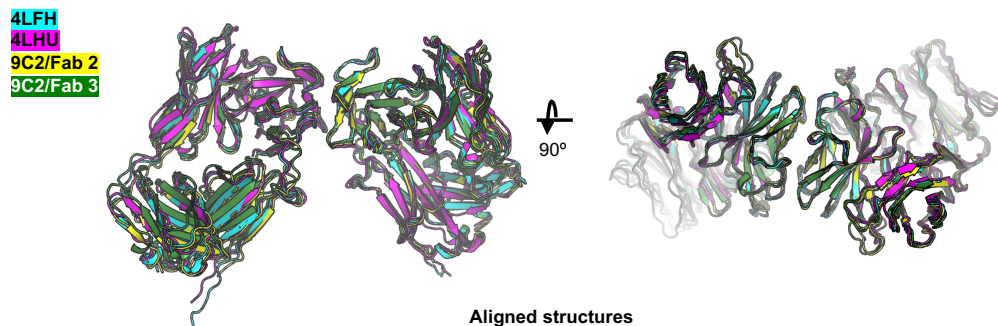

**Supplementary Figure 8. V $\gamma$ 5-mediated dimerization in 9C2 TCR ECD x-ray structures**

**a, b)** Neighboring asymmetric units in 9C2 TCR ECD (**a**) and 9C2 TCR ECD in complex with CD1d (**b**) display a V $\gamma$ 5-V $\gamma$ 5 interaction. **c, d)** cryoEM structures of 9C2 TCR bound by Fab 2 (**c**) and Fab 3 (**d**) shown from the same viewing angle as **a** and **b**. **e)** Aligned structures (using TCR  $\gamma$  chain) from **a-b** with binding partners hidden for clarity. Each of the structures shows the same V $\gamma$ 5-mediated dimerization mode.



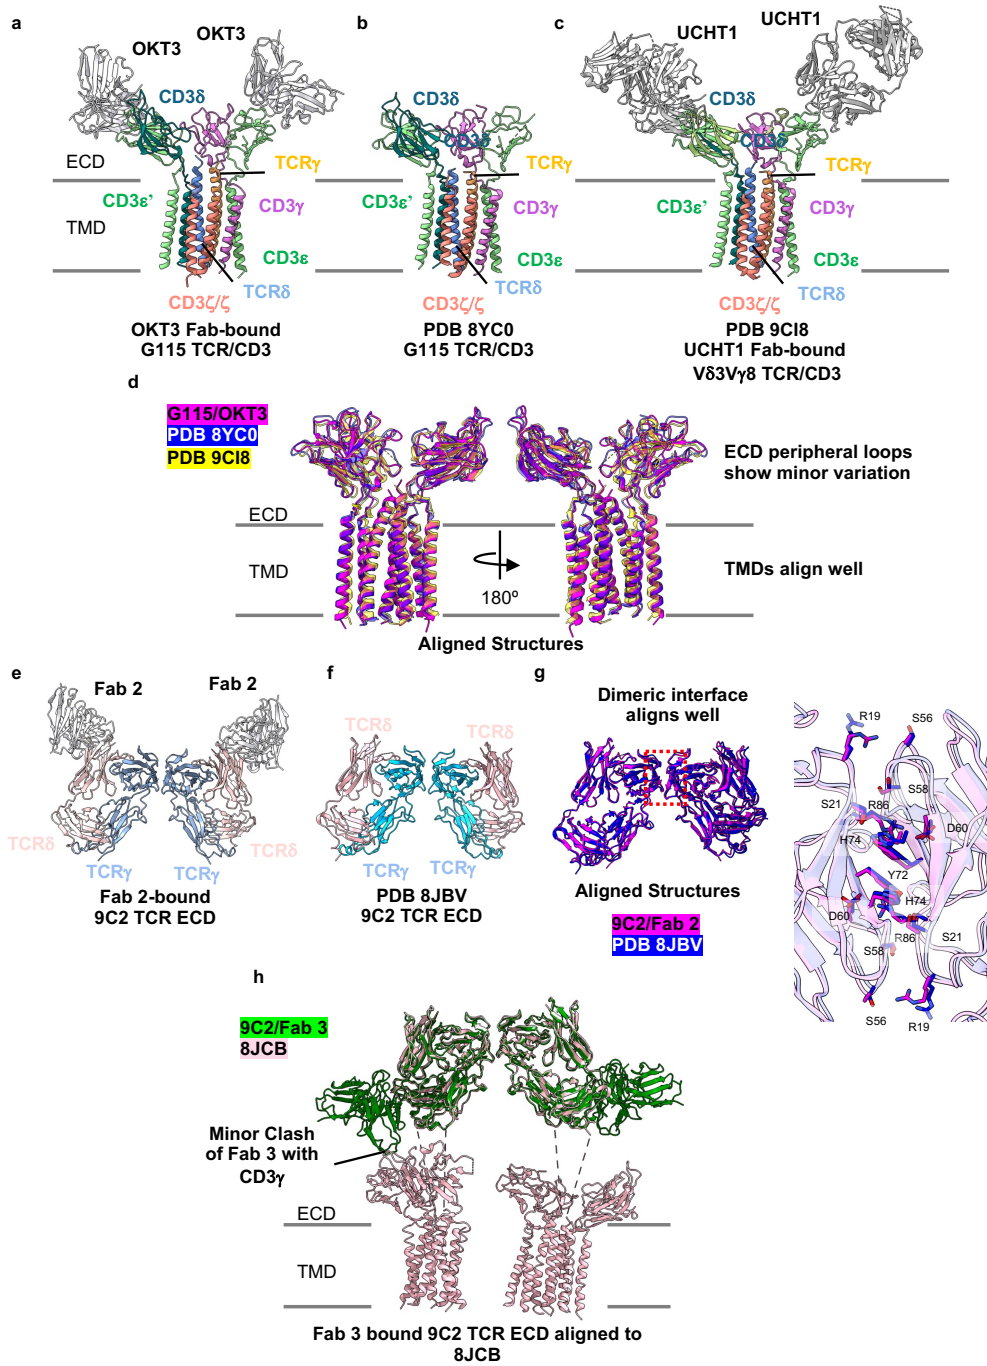

**Supplementary Figure 9. Comparison of cryoEM structures from this study to published  $\gamma\delta$  TCR structures**

**a)** Structure of OKT3 Fab-bound G115 TCR/CD3 complex, with the TCR and CD3 chains colored as indicated. **b)** PDB: 8YC0, apo-G115 TCR/CD3 complex structure. **c)** PDB: 9CI8, UCHT1 Fab-bound V $\delta$ 3V $\gamma$ 8 TCR/CD3 complex structure. **d)** Structural alignment of the three  $\gamma\delta$  TCR/CD3 structures shown in **a-c**. Complexes are colored as indicated. **e)** Structure of Fab 2-bound 9C2  $\gamma\delta$  TCR ECD. **f)** PDB 8JVB, dimeric  $\gamma\delta$  9C2 TCR ECD. **g)** Alignment of Fab 2 bound 9C2 TCR ECD to 8JBV. Boxed region in left panel is enlarged in right panel. Dimeric interface residues are shown as sticks and are colored based on the corresponding model. **h)** Alignment of Fab 3-bound 9C2 TCR ECD to published medium resolution structure of full-length 9C2  $\gamma\delta$  TCR/CD3 complex (PDB 8JCB). Note: a minor clash is observed between Fab 3 and CD3 $\gamma$  of one asymmetric unit of 8JCB, which likely would not prevent binding of Fab 3 due to the flexibility of the  $\gamma\delta$  TCR ECD.

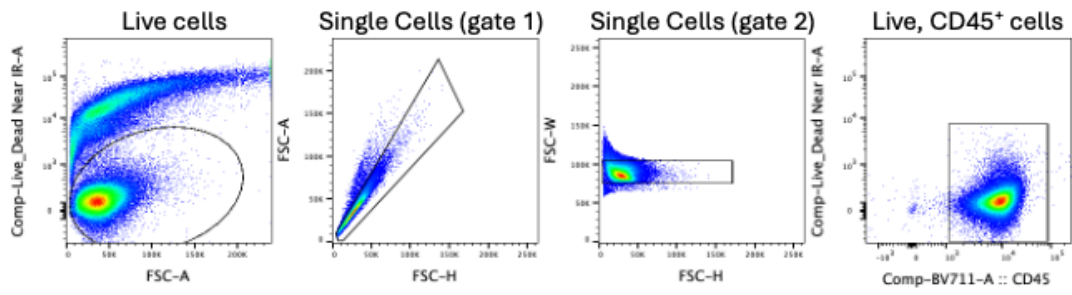

**Supplementary Figure 10. Gating strategy for flow cytometry experiment shown in Fig. 5C.**
